# Supplementary material for: Reduced Expression of PROX1 Transitions Glioblastoma Cells into a Mesenchymal Gene Expression Subtype
Source: Oxford University Press journal article supplement (doi:10.1158/0008-5472.can-18-0320), 2018-08-22
Supplement: 00085472can180320-sup-196357_2_supp_4942879_pd94sk.xlsx [file 00085472can180320-sup-196357_2_supp_4942879_pd94sk.xlsx]

## Sheet: Promer sequences
Supplemental Table 2. List of primer sequences used in this study for qRT-PCR analyses
Gene	Forward sequence	Reverse sequence	Vendor
PROX1	GACGTAAAGTTCAACAGATGCA	CCCGTAATGTGATCTGAGCA	Life Technologies
SOX2	TGCGAGCGCTGCACAT	GCAGCGTGTACTTATCCTTCTTCA	Life Technologies
GFAP	AGGCAGAAGCTCCAGGATG	CAGCGACTCAATCTTCCTCTC	Life Technologies
MAP2	CTCAGCACCGCTAACAGAGG	CATTGGCGCTTCGGACAAG	Life Technologies
OLIG2	TTTCCAAGATCGCCACGC	TCCTCCAGCGAGTTGGTGA	Life Technologies
FN1	CAGTGGGAGACCTCGAGAAG	TCCCTCGGAACATCAGAAAC	Life Technologies
THRAP3	CCAGAGATACACAGGAGAATAG	ACCTCGTTTAAGATCTCTCTC	Sigma-Aldrich
GAPDH	ACAGTTGCCATGTAGACC	TTGAGCACAGGGTACTTTA	Sigma-Aldrich
