# Supplementary material for: Reduced Expression of PROX1 Transitions Glioblastoma Cells into a Mesenchymal Gene Expression Subtype
Source: Oxford University Press journal article supplement (doi:10.1158/0008-5472.can-18-0320), 2018-08-22
Supplement: 00085472can180320-sup-196357_2_supp_4942908_pdq4sk.xlsx [file 00085472can180320-sup-196357_2_supp_4942908_pdq4sk.xlsx]

## Sheet: PROX1 gene sets
Supplemental Table 3. Enriched gene sets for genes that were found to be differentially expressed between PROX1 high versus low glioblastoma cell lines. The first section of the table displays the 137 genes sets that were significantly (p<0.05) enriched for cell lines with high PROX1 expression and the second part the 71 gene sets significantly (p<0.05) enriched in glioblastoma cell lines with lo…
HIGH PROX1 gene sets
Gene Set Data Base	GENE SET NAME	NOM p-val	SIZE	FDR q-val
C2 Curated gene sets	GROSS_HYPOXIA_VIA_ELK3_UP	0.0102669	20	1.0
C2 Curated gene sets	KEGG_OOCYTE_MEIOSIS	0.0102249	19	1.0
C2 Curated gene sets	ENK_UV_RESPONSE_EPIDERMIS_UP	0.0142566	23	1.0
C2 Curated gene sets	REACTOME_CELL_CELL_COMMUNICATION	0.00411523	20	1.0
C2 Curated gene sets	KAAB_HEART_ATRIUM_VS_VENTRICLE_DN	0.0247423	24	1.0
C2 Curated gene sets	CONCANNON_APOPTOSIS_BY_EPOXOMICIN_UP	0.00608519	38	1.0
C2 Curated gene sets	MORI_LARGE_PRE_BII_LYMPHOCYTE_UP	0.04158	15	1.0
C2 Curated gene sets	ZHU_CMV_ALL_DN	0.0354906	22	1.0
C2 Curated gene sets	MIKKELSEN_NPC_HCP_WITH_H3K27ME3	0.0283976	17	1.0
C2 Curated gene sets	PID_PDGFRB_PATHWAY	0.0234043	39	1.0
C2 Curated gene sets	BENPORATH_SOX2_TARGETS	0.0303644	49	1.0
C2 Curated gene sets	SHEN_SMARCA2_TARGETS_DN	0.0357895	29	1.0
C2 Curated gene sets	UDAYAKUMAR_MED1_TARGETS_DN	0.030303	22	1.0
C2 Curated gene sets	KYNG_DNA_DAMAGE_DN	0.0363636	24	0.9815784
C2 Curated gene sets	BUYTAERT_PHOTODYNAMIC_THERAPY_STRESS_UP	0.00792079	65	1.0
C2 Curated gene sets	YOSHIMURA_MAPK8_TARGETS_DN	0.0294118	33	1.0
C2 Curated gene sets	MOOTHA_MITOCHONDRIA	0.0483871	25	0.98094624
C3 Motif gene sets	AP1_Q4_01	0.003861	21	0.4859037
C3 Motif gene sets	EGR_Q6	0.00391389	16	0.3181551
C3 Motif gene sets	ETS2_B	0	18	0.31176034
C3 Motif gene sets	TMTCGCGANR_UNKNOWN	0.00996016	22	0.2411114
C3 Motif gene sets	RYTAAWNNNTGAY_UNKNOWN	0.00378788	26	0.26966876
C3 Motif gene sets	AAAYRNCTG_UNKNOWN	0	28	0.2893101
C3 Motif gene sets	MYCMAX_B	0.00795229	16	0.28835323
C3 Motif gene sets	MAF_Q6	0.0095057	24	0.27403197
C3 Motif gene sets	AR_Q6	0.0168067	19	0.24730317
C3 Motif gene sets	GGGAGGRR_MAZ_Q6	0.00809717	48	0.42963395
C3 Motif gene sets	SOX5_01	0.0380762	27	0.47941566
C3 Motif gene sets	AP1_Q2	0.0335196	26	0.4527762
C3 Motif gene sets	EGR1_01	0.0498084	20	0.4671901
C3 Motif gene sets	NFKB_Q6_01	0.0409357	20	0.4497896
C3 Motif gene sets	SCGGAAGY_ELK1_02	0.0251938	23	0.4810996
C3 Motif gene sets	ELF1_Q6	0.045738	19	0.4725132
C3 Motif gene sets	NFKB_Q6	0.0412574	25	0.465495
C3 Motif gene sets	GTTTGTT_MIR495	0.0328185	16	0.4593721
C3 Motif gene sets	CCGNMNNTNACG_UNKNOWN	0.0177515	65	0.5274413
C3 Motif gene sets	TGANTCA_AP1_C	0.00828157	147	0.5190018
C3 Motif gene sets	TGACATY_UNKNOWN	0.0210526	58	0.54967904
C3 Motif gene sets	OCT1_04	0.0433884	15	0.53707594
C3 Motif gene sets	TTTGTAG_MIR520D	0.0479042	19	0.51779056
C3 Motif gene sets	YGCANTGCR_UNKNOWN	0.0188679	94	0.44536015
C3 Motif gene sets	TTTNNANAGCYR_UNKNOWN	0.0409836	143	0.446462
C4 Computational gene sets	MODULE_122	0.00594059	17	0.33109206
C4 Computational gene sets	MORF_PRKACA	0.0159681	18	0.58589274
C4 Computational gene sets	MORF_RUNX1	0.0208768	15	0.49302492
C4 Computational gene sets	MODULE_1	0.0301811	55	0.93199986
C5 GO gene sets	GO_DEVELOPMENTAL_MATURATION	0	19	0.88120157
C5 GO gene sets	GO_STRUCTURAL_MOLECULE_ACTIVITY	0.00214592	24	0.5711744
C5 GO gene sets	GO_ORGANELLE_INNER_MEMBRANE	0.0100402	19	0.6047548
C5 GO gene sets	GO_CELL_CELL_JUNCTION	0.00628931	27	0.5203426
C5 GO gene sets	GO_PLASMA_MEMBRANE_RAFT	0.0181087	16	0.8998639
C5 GO gene sets	GO_NEGATIVE_REGULATION_OF_ORGANELLE_ORGANIZATION	0.00204082	33	0.9548686
C5 GO gene sets	GO_ACTIN_CYTOSKELETON	0.0151515	27	0.8188218
C5 GO gene sets	GO_POSITIVE_REGULATION_OF_CYTOSKELETON_ORGANIZATION	0.0211132	22	1.0
C5 GO gene sets	GO_REGULATION_OF_DNA_REPLICATION	0.00835073	28	1.0
C5 GO gene sets	GO_TRANSCRIPTION_COREPRESSOR_ACTIVITY	0.034632	15	0.95858884
C5 GO gene sets	GO_CYTOSKELETAL_PROTEIN_BINDING	0.0235546	50	0.977486
C5 GO gene sets	GO_POSITIVE_REGULATION_OF_ENDOTHELIAL_CELL_PROLIFERATION	0.0221774	18	1.0
C5 GO gene sets	GO_REGULATION_OF_CYTOPLASMIC_TRANSPORT	0.0184049	58	0.952877
C5 GO gene sets	GO_MUSCLE_ORGAN_DEVELOPMENT	0.0169133	19	0.92497724
C5 GO gene sets	GO_CARBOHYDRATE_DERIVATIVE_METABOLIC_PROCESS	0.0199601	47	0.9489095
C5 GO gene sets	GO_MYELOID_LEUKOCYTE_DIFFERENTIATION	0.029661	17	0.9181834
C5 GO gene sets	GO_RESPONSE_TO_NUTRIENT	0.0214133	30	0.89831984
C5 GO gene sets	GO_CYTOPLASMIC_REGION	0.0333988	18	0.8565446
C5 GO gene sets	GO_REGULATION_OF_STAT_CASCADE	0.0411255	20	0.8191
C5 GO gene sets	GO_REGULATION_OF_INTRACELLULAR_TRANSPORT	0.0330578	69	0.90066177
C5 GO gene sets	GO_INORGANIC_ION_TRANSMEMBRANE_TRANSPORT	0.043299	16	0.90592664
C5 GO gene sets	GO_SENSORY_PERCEPTION	0.0203252	31	0.8764865
C5 GO gene sets	GO_CELL_CORTEX	0.0393701	17	0.8413187
C5 GO gene sets	GO_MEMBRANE_MICRODOMAIN	0.040404	36	0.8237366
C5 GO gene sets	GO_NUCLEAR_ENVELOPE	0.0469083	32	0.8387737
C5 GO gene sets	GO_ION_HOMEOSTASIS	0.0336842	40	0.83345246
C5 GO gene sets	GO_POSITIVE_REGULATION_OF_OXIDOREDUCTASE_ACTIVITY	0.0445344	15	0.8497339
C5 GO gene sets	GO_CELL_JUNCTION	0.0274841	82	0.82331795
C5 GO gene sets	GO_CYTOSKELETON	0.0107296	117	0.8674936
C5 GO gene sets	GO_TRANSPORTER_ACTIVITY	0.0291667	31	0.8050437
C5 GO gene sets	GO_POSITIVE_REGULATION_OF_ORGANELLE_ORGANIZATION	0.0261569	64	0.7753745
C5 GO gene sets	GO_RESPONSE_TO_BACTERIUM	0.049896	45	0.79694766
C5 GO gene sets	GO_CYTOPLASMIC_SIDE_OF_MEMBRANE	0.0433839	30	0.76206106
C5 GO gene sets	GO_REGULATION_OF_ORGANELLE_ORGANIZATION	0.019685	111	0.76011217
C5 GO gene sets	GO_POSITIVE_REGULATION_OF_PEPTIDYL_TYROSINE_PHOSPHORYLATION	0.0315126	31	0.73008794
C5 GO gene sets	GO_ENVELOPE	0.0410367	63	0.69730246
C5 GO gene sets	GO_NON_MEMBRANE_SPANNING_PROTEIN_TYROSINE_KINASE_ACTIVITY	0.0428266	17	0.6938696
C5 GO gene sets	GO_POSITIVE_REGULATION_OF_EPITHELIAL_CELL_PROLIFERATION	0.0459519	38	0.6800368
C5 GO gene sets	GO_REGULATION_OF_PEPTIDYL_TYROSINE_PHOSPHORYLATION	0.0311203	39	0.6672906
C5 GO gene sets	GO_PROTEIN_AUTOPHOSPHORYLATION	0.0273109	48	0.6843307
C5 GO gene sets	GO_POSITIVE_REGULATION_OF_DNA_METABOLIC_PROCESS	0.0376984	34	0.6961065
C5 GO gene sets	GO_MACROMOLECULAR_COMPLEX_BINDING	0.0306513	129	0.6857191
C5 GO gene sets	GO_SYSTEM_PROCESS	0.0215054	102	0.6846254
C5 GO gene sets	GO_BIOLOGICAL_ADHESION	0.0445344	93	0.67713183
C5 GO gene sets	GO_CELLULAR_RESPONSE_TO_OXYGEN_CONTAINING_COMPOUND	0.0331858	105	0.63548297
C5 GO gene sets	GO_REGULATION_OF_EPITHELIAL_CELL_PROLIFERATION	0.043379	63	0.64457536
C5 GO gene sets	GO_PROTEIN_COMPLEX_SUBUNIT_ORGANIZATION	0.039627	98	0.6500574
C5 GO gene sets	GO_POSITIVE_REGULATION_OF_MULTICELLULAR_ORGANISMAL_PROCESS	0.0150538	175	0.6473795
C5 GO gene sets	GO_POSITIVE_REGULATION_OF_DEVELOPMENTAL_PROCESS	0.0299786	153	0.658753
C6 Oncogenic signature	RELA_DN.V1_UP	0.00809717	18	0.22750954
C6 Oncogenic signature	STK33_SKM_UP	0.0162933	17	0.28104404
C6 Oncogenic signature	ATF2_UP.V1_UP	0.0101626	15	0.19897048
C6 Oncogenic signature	E2F1_UP.V1_UP	0.0469667	20	0.2866516
Hallmark gene set	HALLMARK_APOPTOSIS	0.0377359	27	0.68610436
C7 Immunologic signature	GSE1432_1H_VS_6H_IFNG_MICROGLIA_DN	0	16	0.74578434
C7 Immunologic signature	GSE29618_MONOCYTE_VS_MDC_UP	0	16	0.7602793
C7 Immunologic signature	GSE7764_IL15_NK_CELL_24H_VS_SPLENOCYTE_DN	0.00212314	15	0.5572025
C7 Immunologic signature	GSE24574_BCL6_HIGH_TFH_VS_TCONV_CD4_TCELL_UP	0.00587084	21	0.5887438
C7 Immunologic signature	GSE42021_TCONV_PLN_VS_CD24INT_TCONV_THYMUS_UP	0.0102881	18	0.617513
C7 Immunologic signature	GSE28783_ANTI_MIR33_VS_UNTREATED_ATHEROSCLEROSIS_MACROPHAGE_UP	0.0121212	28	0.65386474
C7 Immunologic signature	GSE19401_PAM2CSK4_VS_RETINOIC_ACID_AND_PAM2CSK4_STIM_FOLLICULAR_DC_DN	0.00840336	19	0.5797791
C7 Immunologic signature	GSE369_PRE_VS_POST_IL6_INJECTION_SOCS3_KO_LIVER_DN	0.00407332	15	0.8275745
C7 Immunologic signature	GSE44955_MCSF_VS_MCSF_AND_IL27_STIM_MACROPHAGE_UP	0.0127389	15	0.7774658
C7 Immunologic signature	GSE40068_CXCR5POS_BCL6POS_TFH_VS_CXCR5NEG_BCL6NEG_CD4_TCELL_UP	0.0102459	15	0.86015576
C7 Immunologic signature	GSE8835_HEALTHY_VS_CLL_CD4_TCELL_UP	0.0204918	16	0.8006778
C7 Immunologic signature	GSE23114_WT_VS_SLE2C1_MOUSE_SPLEEN_B1A_BCELL_DN	0.0175439	18	0.981974
C7 Immunologic signature	GSE20500_CTRL_VS_RETINOIC_ACID_TREATED_CD4_TCELL_UP	0.0234834	15	0.9699305
C7 Immunologic signature	GSE43955_TH0_VS_TGFB_IL6_TH17_ACT_CD4_TCELL_10H_UP	0.019305	16	0.94834435
C7 Immunologic signature	GSE17721_0.5H_VS_4H_CPG_BMDC_DN	0.0105708	18	0.93898666
C7 Immunologic signature	GSE17721_PAM3CSK4_VS_GADIQUIMOD_12H_BMDC_DN	0.0299145	15	0.91556495
C7 Immunologic signature	GSE13411_IGM_VS_SWITCHED_MEMORY_BCELL_UP	0.0401606	15	0.9056399
C7 Immunologic signature	GSE18281_SUBCAPSULAR_CORTICAL_REGION_VS_WHOLE_CORTEX_THYMUS_DN	0.0325866	18	0.8986574
C7 Immunologic signature	GSE2706_UNSTIM_VS_8H_LPS_AND_R848_DC_DN	0.0310559	19	0.8818854
C7 Immunologic signature	GSE37301_LYMPHOID_PRIMED_MPP_VS_COMMON_LYMPHOID_PROGENITOR_DN	0.0173745	22	0.8858699
C7 Immunologic signature	GSE17721_12H_VS_24H_CPG_BMDC_UP	0.0306122	16	0.9083838
C7 Immunologic signature	GSE360_CTRL_VS_L_MAJOR_DC_UP	0.0244898	16	0.9023425
C7 Immunologic signature	GSE20727_CTRL_VS_ROS_INHIBITOR_TREATED_DC_DN	0.0431373	17	0.9137402
C7 Immunologic signature	GSE29618_BCELL_VS_MDC_DAY7_FLU_VACCINE_DN	0.0377734	15	0.90575546
C7 Immunologic signature	GSE360_DC_VS_MAC_B_MALAYI_HIGH_DOSE_DN	0.0437376	23	0.8712071
C7 Immunologic signature	GSE7548_NAIVE_VS_DAY28_PCC_IMMUNIZATION_CD4_TCELL_DN	0.0488798	17	0.85193986
C7 Immunologic signature	GSE32986_GMCSF_VS_GMCSF_AND_CURDLAN_LOWDOSE_STIM_DC_DN	0.039501	17	0.87457335
C7 Immunologic signature	GSE30962_ACUTE_VS_CHRONIC_LCMV_PRIMARY_INF_CD8_TCELL_DN	0.0482897	18	0.8560574
C7 Immunologic signature	GSE17721_LPS_VS_CPG_12H_BMDC_UP	0.0412148	16	0.9152367
C7 Immunologic signature	GSE22886_NAIVE_BCELL_VS_BM_PLASMA_CELL_DN	0.0271967	16	0.90137815
C7 Immunologic signature	GSE20151_CTRL_VS_FUSOBACT_NUCLEATUM_NEUTROPHIL_UP	0.0311891	15	0.87813824
C7 Immunologic signature	GSE20727_CTRL_VS_ROS_INHIBITOR_TREATED_DC_UP	0.0453649	18	0.8722803
C7 Immunologic signature	GSE44732_UNSTIM_VS_IL27_STIM_IMATURE_DC_DN	0.0353635	18	0.8777388
C7 Immunologic signature	GSE25123_WT_VS_PPARG_KO_MACROPHAGE_IL4_STIM_DN	0.0498008	15	0.8752049
C7 Immunologic signature	GSE21927_SPLEEN_VS_BONE_MARROW_MONOCYTE_BALBC_UP	0.0490798	15	0.8891456
C7 Immunologic signature	GSE17721_CTRL_VS_CPG_4H_BMDC_DN	0.0372671	15	0.94997466
C7 Immunologic signature	GSE22886_IGG_IGA_MEMORY_BCELL_VS_BM_PLASMA_CELL_DN	0.0435685	15	0.94538784
LOW PROX1 gene sets
Gene Set Data Base	GENE SET NAME	NOM p-val	SIZE	FDR q-val
C2 Curated gene sets	MCLACHLAN_DENTAL_CARIES_UP	0.002079	20	0.958283
C2 Curated gene sets	LI_INDUCED_T_TO_NATURAL_KILLER_UP	0.0139442	17	1.0
C2 Curated gene sets	REACTOME_DOWNSTREAM_SIGNALING_EVENTS_OF_B_CELL_RECEPTOR_BCR	0.0138889	21	1.0
C2 Curated gene sets	STEIN_ESRRA_TARGETS_UP	0.0245902	15	1.0
C2 Curated gene sets	REACTOME_SIGNALING_BY_THE_B_CELL_RECEPTOR_BCR	0.033195	24	1.0
C2 Curated gene sets	FIRESTEIN_PROLIFERATION	0.0356436	31	1.0
C2 Curated gene sets	RIZKI_TUMOR_INVASIVENESS_3D_UP	0.0235756	23	1.0
C2 Curated gene sets	REACTOME_ADAPTIVE_IMMUNE_SYSTEM	0.00965251	61	1.0
C2 Curated gene sets	FARMER_BREAST_CANCER_APOCRINE_VS_LUMINAL	0.0475248	20	1.0
C2 Curated gene sets	VERHAAK_GLIOBLASTOMA_MESENCHYMAL	0.0475207	29	1.0
C3 Motif gene sets	TNCATNTCCYR_UNKNOWN	0.014	20	1.0
C3 Motif gene sets	TCF11MAFG_01	0.0396975	17	1.0
C3 Motif gene sets	WTTGKCTG_UNKNOWN	0.0172745	45	1.0
C3 Motif gene sets	VDR_Q3	0.0470348	23	1.0
C3 Motif gene sets	YTCCCRNNAGGY_UNKNOWN	0.0295276	63	1.0
C4 Computational gene sets	MODULE_136	0.00956023	30	0.2137146
C4 Computational gene sets	MODULE_37	0.0321361	34	0.75017184
C5 GO gene sets	GO_REPLICATION_FORK	0.00625	15	1.0
C5 GO gene sets	GO_POSITIVE_REGULATION_OF_PEPTIDYL_SERINE_PHOSPHORYLATION	0.022541	16	1.0
C5 GO gene sets	GO_REGULATION_OF_PEPTIDYL_SERINE_PHOSPHORYLATION	0.0203666	19	1.0
C5 GO gene sets	GO_EXTERNAL_SIDE_OF_PLASMA_MEMBRANE	0.0159363	26	1.0
C5 GO gene sets	GO_NEGATIVE_REGULATION_OF_PROTEOLYSIS	0.0353635	30	1.0
C5 GO gene sets	GO_REGULATION_OF_PROTEOLYSIS	0.0469667	75	1.0
C5 GO gene sets	GO_NEGATIVE_REGULATION_OF_PROTEIN_METABOLIC_PROCESS	0.0341556	107	1.0
C6 Oncogenic signature	HOXA9_DN.V1_DN	0.0253411	16	0.63522387
C6 Oncogenic signature	STK33_NOMO_UP	0.0241935	20	0.50506586
C6 Oncogenic signature	RPS14_DN.V1_UP	0.0489796	15	0.4798125
Hallmark gene set	GSE1432_6H_VS_24H_IFNG_MICROGLIA_UP	0.00380952	18	1.0
Hallmark gene set	GSE7460_TCONV_VS_TREG_LN_DN	0.00589391	17	1.0
Hallmark gene set	GSE27786_LIN_NEG_VS_CD4_TCELL_DN	0.00198807	18	1.0
Hallmark gene set	GSE11961_GERMINAL_CENTER_BCELL_DAY7_VS_GERMINAL_CENTER_BCELL_DAY40_UP	0.00603622	20	1.0
Hallmark gene set	GSE3982_BCELL_VS_TH1_DN	0.0196464	16	1.0
Hallmark gene set	GSE9988_LOW_LPS_VS_CTRL_TREATED_MONOCYTE_UP	0.0164948	20	1.0
Hallmark gene set	GSE16522_ANTI_CD3CD28_STIM_VS_UNSTIM_MEMORY_CD8_TCELL_UP	0.0149573	15	1.0
Hallmark gene set	GSE3982_BCELL_VS_TH2_DN	0.040568	15	1.0
Hallmark gene set	GSE26351_UNSTIM_VS_BMP_PATHWAY_STIM_HEMATOPOIETIC_PROGENITORS_UP	0.0316206	21	1.0
Hallmark gene set	GSE3982_MAC_VS_NEUTROPHIL_DN	0.0077821	15	0.9807086
Hallmark gene set	GSE5589_LPS_VS_LPS_AND_IL6_STIM_MACROPHAGE_45MIN_DN	0.0454545	18	0.90284574
Hallmark gene set	GSE28726_ACT_CD4_TCELL_VS_ACT_NKTCELL_UP	0.0252918	20	0.8622391
Hallmark gene set	GSE13484_3H_UNSTIM_VS_YF17D_VACCINE_STIM_PBMC_DN	0.0216963	16	0.8112404
Hallmark gene set	GSE7548_NAIVE_VS_DAY7_PCC_IMMUNIZATION_CD4_TCELL_UP	0.0294695	21	0.92370164
Hallmark gene set	GSE13738_RESTING_VS_BYSTANDER_ACTIVATED_CD4_TCELL_DN	0.03125	21	0.93414307
Hallmark gene set	GSE23321_CD8_STEM_CELL_MEMORY_VS_EFFECTOR_MEMORY_CD8_TCELL_UP	0.0391389	15	0.89645696
Hallmark gene set	GSE32986_UNSTIM_VS_CURDLAN_LOWDOSE_STIM_DC_DN	0.0384615	15	0.8634939
Hallmark gene set	GSE27670_CTRL_VS_LMP1_TRANSDUCED_GC_BCELL_DN	0.040856	15	0.8700959
Hallmark gene set	GSE17721_CTRL_VS_CPG_1H_BMDC_DN	0.0304183	20	0.8399684
Hallmark gene set	GSE24574_NAIVE_VS_TCONV_CD4_TCELL_DN	0.0235756	18	0.81710887
Hallmark gene set	GSE23925_LIGHT_ZONE_VS_NAIVE_BCELL_UP	0.0201207	19	0.79215944
Hallmark gene set	GSE17721_LPS_VS_PAM3CSK4_0.5H_BMDC_UP	0.0408998	16	0.775296
Hallmark gene set	GSE36826_WT_VS_IL1R_KO_SKIN_STAPH_AUREUS_INF_DN	0.0443548	17	0.7598283
Hallmark gene set	GSE2706_R848_VS_R848_AND_LPS_2H_STIM_DC_DN	0.029703	19	0.7971516
Hallmark gene set	GSE15330_HSC_VS_LYMPHOID_PRIMED_MULTIPOTENT_PROGENITOR_IKAROS_KO_DN	0.019084	15	0.76662993
Hallmark gene set	GSE5142_HTERT_TRANSDUCED_VS_CTRL_CD8_TCELL_LATE_PASSAGE_CLONE_DN	0.0499002	16	0.7407246
Hallmark gene set	GSE17721_0.5H_VS_4H_LPS_BMDC_DN	0.0223881	17	0.7241445
Hallmark gene set	GSE22935_WT_VS_MYD88_KO_MACROPHAGE_12H_MBOVIS_BCG_STIM_DN	0.0294695	18	0.7022673
Hallmark gene set	GSE3982_MAC_VS_CENT_MEMORY_CD4_TCELL_DN	0.0254902	19	0.7025474
Hallmark gene set	GSE40274_CTRL_VS_EOS_TRANSDUCED_ACTIVATED_CD4_TCELL_UP	0.0302457	18	0.68221116
Hallmark gene set	GSE43957_UNTREATED_VS_NACL_TREATED_ANTI_CD3_CD28_STIM_CD4_TCELL_DN	0.0479846	15	0.6740234
Hallmark gene set	GSE3982_BCELL_VS_NKCELL_DN	0.0231214	19	0.66779304
Hallmark gene set	GSE3982_BASOPHIL_VS_EFF_MEMORY_CD4_TCELL_UP	0.0427699	18	0.6581937
Hallmark gene set	GSE3982_CENT_MEMORY_CD4_TCELL_VS_NKCELL_DN	0.0264228	15	0.6440277
Hallmark gene set	GSE45365_NK_CELL_VS_CD11B_DC_DN	0.0280561	21	0.63216823
Hallmark gene set	GSE42088_UNINF_VS_LEISHMANIA_INF_DC_8H_UP	0.0425532	16	0.6509334
Hallmark gene set	GSE22282_HYPOXIA_VS_NORMOXIA_MYELOID_DC_UP	0.0364683	15	0.66123515
Hallmark gene set	GSE5589_LPS_VS_LPS_AND_IL10_STIM_IL10_KO_MACROPHAGE_45MIN_DN	0.0396825	15	0.6886814
Hallmark gene set	GSE3039_NKT_CELL_VS_B2_BCELL_DN	0.0294737	16	0.67577076
Hallmark gene set	GSE25123_WT_VS_PPARG_KO_MACROPHAGE_UP	0.0391389	18	0.6720144
Hallmark gene set	GSE9988_ANTI_TREM1_VS_ANTI_TREM1_AND_LPS_MONOCYTE_DN	0.040404	15	0.6803679
Hallmark gene set	GSE360_L_MAJOR_VS_T_GONDII_MAC_DN	0.0490196	19	0.727325
Hallmark gene set	GSE14769_UNSTIM_VS_40MIN_LPS_BMDM_DN	0.0220441	24	0.7627665
Hallmark gene set	GSE21546_ELK1_KO_VS_SAP1A_KO_AND_ELK1_KO_ANTI_CD3_STIM_DP_THYMOCYTES_DN	0.040367	20	0.76576036
